# Supplementary figures and images for: Aspergillus section Nidulantes (formerly Emericella): Polyphasic taxonomy, chemistry and biology
Source: PubMed Central journal article supplement — Stud Mycol. 2016 Oct 19;84:1–118. doi: 10.1016/j.simyco.2016.10.001 (PMC5198626; doi:10.1016/j.simyco.2016.10.001), 2016-10-19

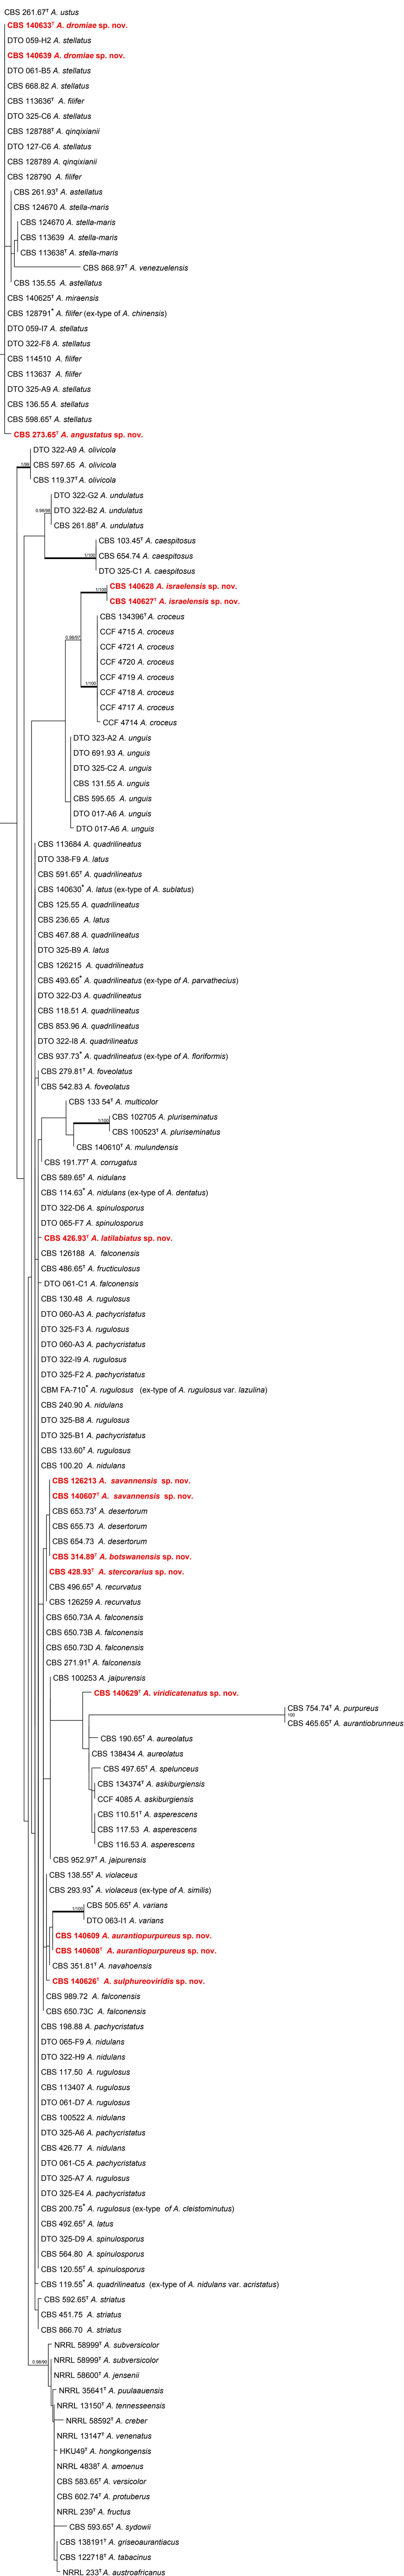

Supplement: mmc1.pdf [file mmc1.pdf]

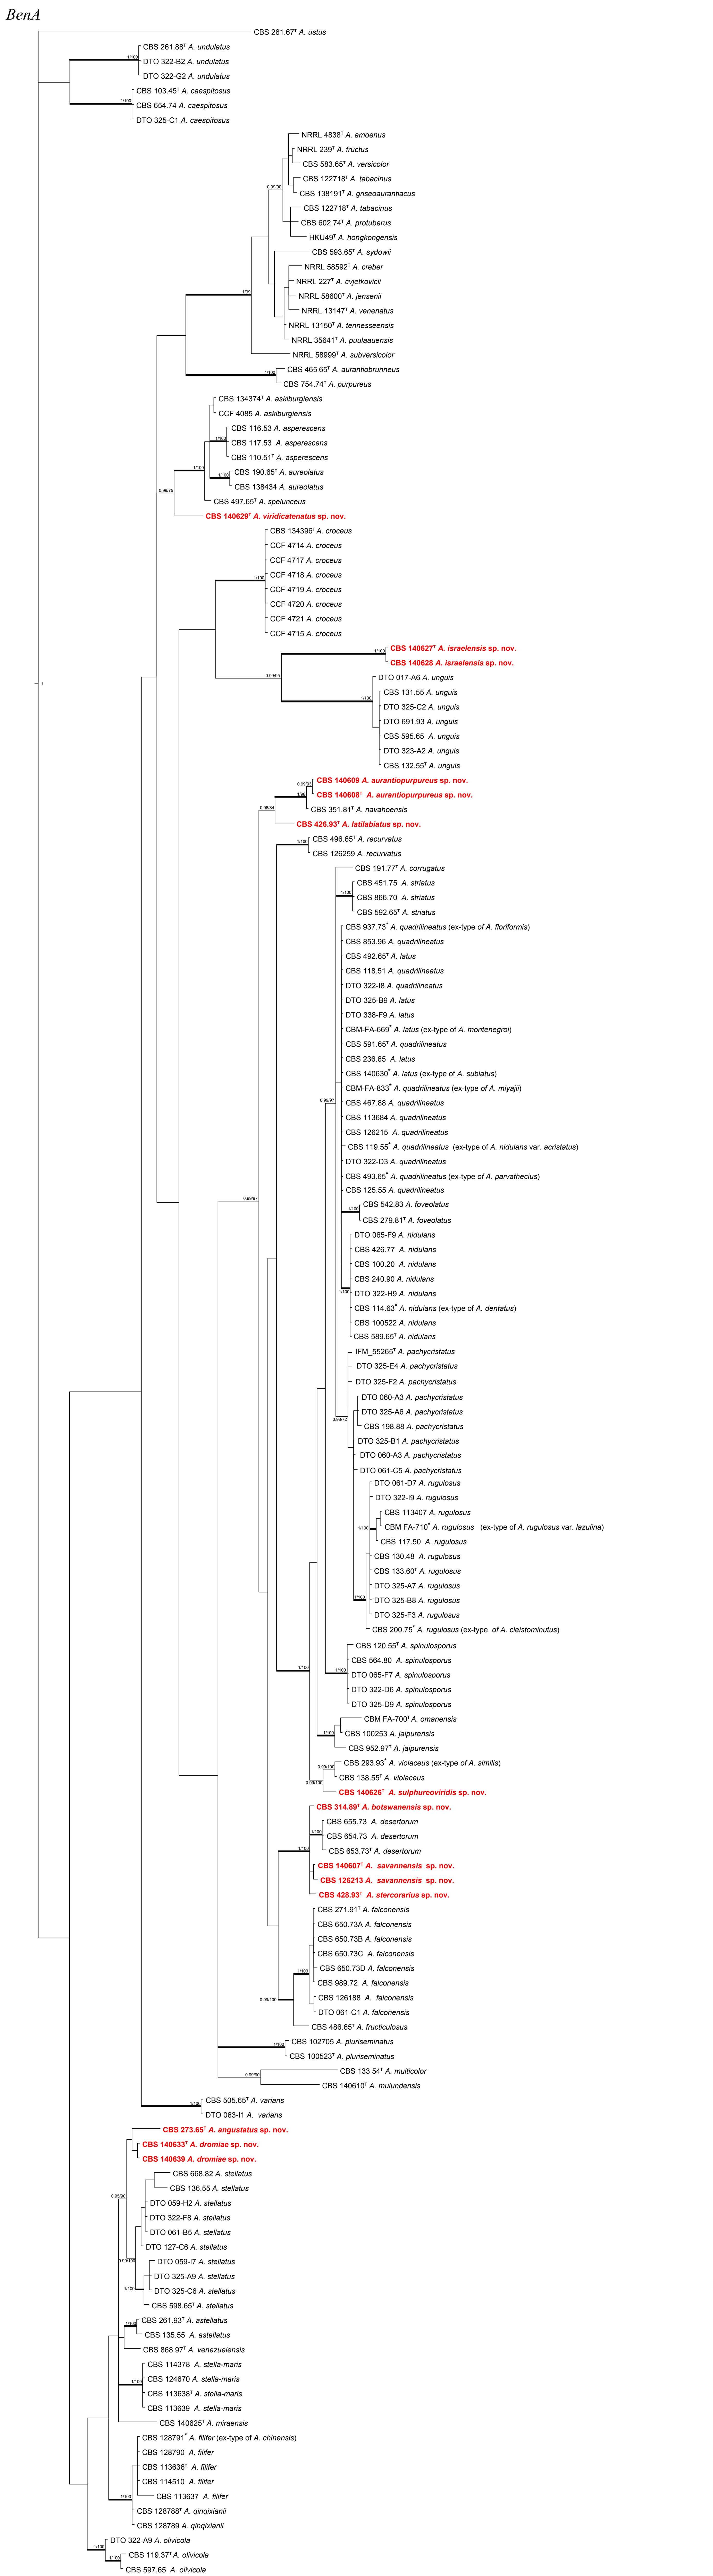

Supplement: mmc2.pdf [file mmc2.pdf]

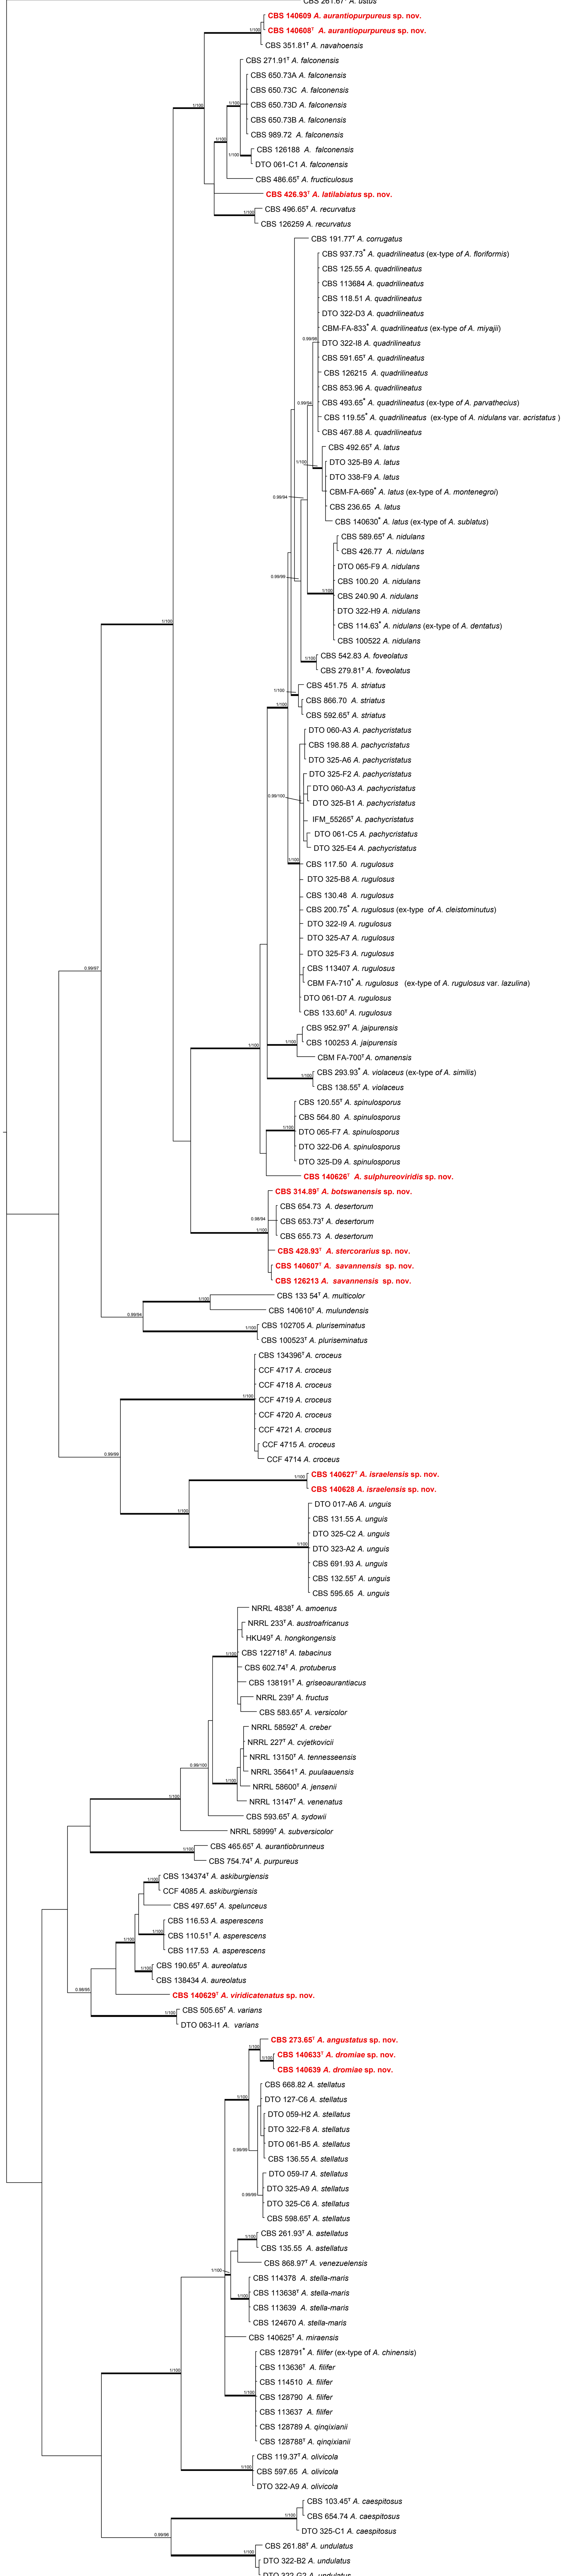

Supplement: mmc3.pdf [file mmc3.pdf]

CBS 261.67<sup>T</sup> *A. ustus*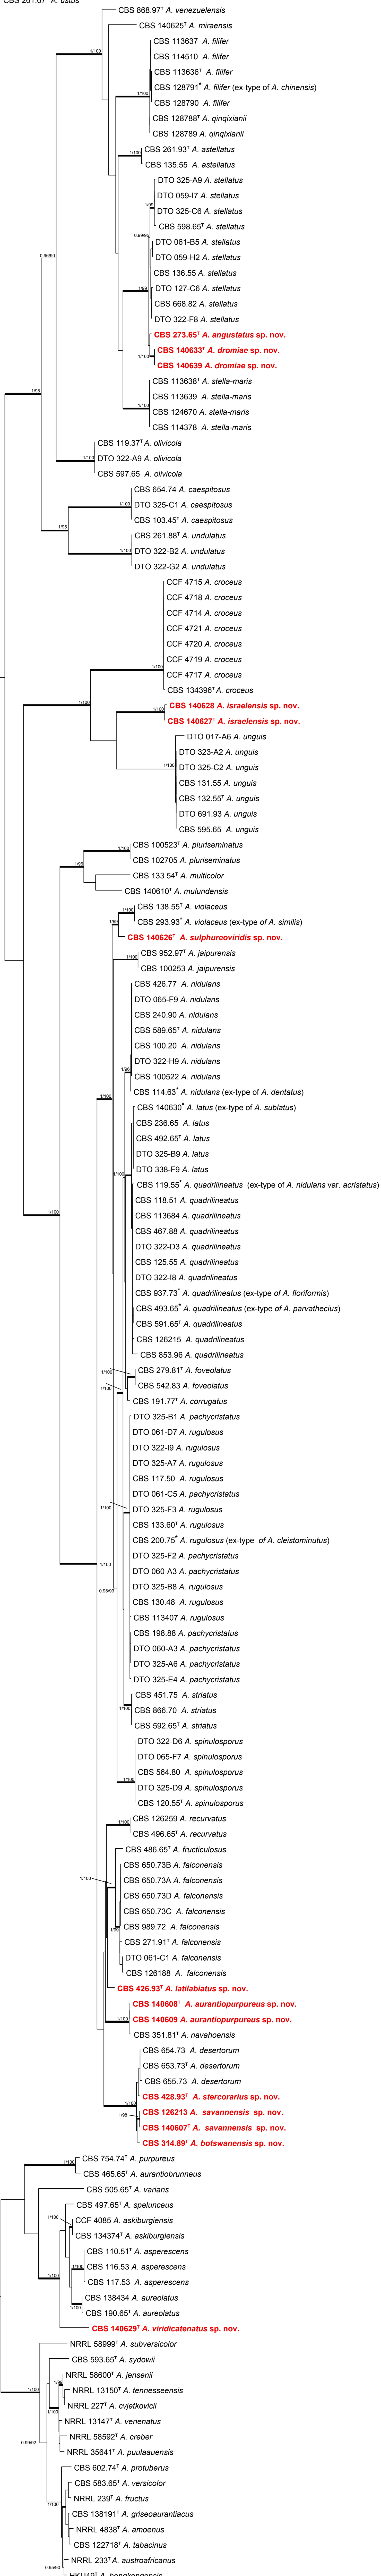

Supplement: mmc4.pdf [file mmc4.pdf]
